# Supplementary material
Source: publisher figshare collection journal article supplement (https://gsapubs.figshare.com/ndownloader/files/28854366)
Supplement: Supplementary file 1 [file 28854366]

## Sheet: Sheet1
Table S1: Summary of Geochronology
Sample ID	Age	Rock Type	Location	U-Pb Zircon age (Ma)	40Ar/39Ar date (Ma)	AFT date (Ma)	ZHe date (Ma)	AHe date (Ma)	Geochron Reference	Location	Elevation (m)
16CH01	Proterozoic	Granodiorite	Chiricahua Mtns.			25.6 ± 1.7	26.0 ± 2.6	19.6 ± 2.1		31.9855°N, -109.2477°W	1834
16CH02	Proterozoic	Granodiorite	Chiricahua Mtns.			23.9 ± 1.7	27.8 ± 2.8	15.6 ± 1.0		31.9908°N, -109.2484°W	1614
16PE01	Paleogene	Granite	Peloncillo Mtns.	33.2 ± 0.2		33.8 ±7.4	25.3 ± 0.9	25.6–46.4	McLemore et al., 1995	32.0891°N, -108.9734°W	1358
05BM183	Proterozoic	Amphibolite	Burro Mtns.	1684 ± 14	1451 ± 4 (hb)	11.0 ± 3.8		8.9–17.8	Amato et al., 2011	32.7017°N, -108.5192°W	1833
10BM196	Proterozoic	Quartzofeldspathic gneiss	Burro Mtns.	1655 ± 39			22.8—41.3	15.8 ± 1.9	Amato, unpublished data	32.6554°N, -108.5304°W	1829
10BM204	Proterozoic	Granodiorite	Burro Mtns.	1470 ± 16		26.7 ± 1.4		22.2–33.1	Amato et al., 2011	32.7175°N, -108.5594°W	1916
10BM219	Proterozoic	Diorite	Burro Mtns.	1469 ± 7		21.3 ± 1.6		26.6 ± 0.2	Amato, unpublished data	32.7074 °N, -108.5106°W	1793
SGBM147	Proterozoic	Granite	Burro Mtns.	1492 ± 14				20.1 ± 0.6	Amato, unpublished data	32.4829 °N, -108.5122°W	1847
17LH01	Proterozoic	Granite	Little Hatchet Mtns.	~1080			28.2–150.8	22.9 ± 2.8	Amato and Mack, 2012	31.7449°N -108.4351°W	1646
17LH02	Proterozoic	Granite	Little Hatchet Mtns.	~1080			25.7 ± 5.0			31.7443°N, -108.4275°W	1438
17LH03	Cretaceous	Sandstone	Little Hatchet Mtns.				29.3 ± 2.6			31.7824°N, -108.4435°W	1565
12CR04	Proterozoic	Granite	Cookes Range	1638 ± 18		10.1 ± 1.3		11.8 ± 1.3	Amato et al., 2018	32.3934°N, -107.7149°W	1523
13COOKS2	Paleogene	Granite	Cookes Range	~39		25.8 ± 3.0	32.4 ± 5.7	9.6 ± 1.3	Amato, unpublished data	32.5381°N, -107.7266°W	2214
16CR02	Proterozoic	Granite	Cookes Range				150.1–245.7	8.3–20.2		32.3919°N, -107.7148°W	1435
16CR01	Proterozoic	Granite	Cookes Range				43.6–129.5			32.4466°N, -107.6906°W	1495
16FL01	Proterozoic	Granite gneiss	Florida Mtns.							32.1544°N -107.6543°W	1378
16FL02	Cambrian	Syenite	Florida Mtns.	~510		28.6 ± 2.3			Amato and Mack, 2012	32.1342°N -107.6490°W	1486
16FL04	Cambrian	Granite	Florida Mtns.	~510		30.0 ± 2.1		9.9–15.6		32.0595°N -107.6588°W	1770
16FL05	Cambrian	Granite	Florida Mtns.			12.2 ± 4.4	25.2 ± 2.8	22.0 ± 1.7		32.0556°N -107.6722°W	2118
06CM01	Proterozoic	Granite	Caballo Mountains	1487 ± 24		17.3 ± 1.8	13.3 ± 0.9	15.5 ± 1.1	Amato et al., 2012	32.9456°N, -107.2591°W	1465
06CM02	Proterozoic	Granite, gneiss	Caballo Mountains	1681 ± 12		14.6 ± 3.9	27.0–271.0	11.1 ± 1.4	Amato et al., 2012	32.9622°N, -107.2624°W	1483
06CM03	Proterozoic	Granite	Caballo Mountains							32.9617°N, -107.2599°W	1468
06CM04	Proterozoic	Granite	Caballo Mountains	1486 ± 16				12.3–35.7	Amato et al., 2012	32.9599°N, -107.2597°W	1460
13CM14	Proterozoic	Quartzite	Caballo Mountains	1644± 14				12.8–15.0	Amato et al., 2018	32.9506°N, -107.2504°W	1556
18FC1	Proterozoic	Granite	Fra Cristobal Mountains	1652 ± 31					Amato et al., 2018	33.3801°N, -107.1176°W	1588
18FC3	Proterozoic	Granite	Fra Cristobal Mountains	~1475 Ma		9.7 ± 1.2	8.3–12.6	10.3–17.3	Amato, unpublished data	33.1563°N, -107.3128°W	1679
18FC4	Proterozoic	Granite	Fra Cristobal Mountains	~1475 Ma		16.7 ± 1.2	11.5 ± 0.8	7.5–12.9	Amato, unpublished data	33.3974°N, -107.1154°W	1658
13MS06	Proterozoic	Granite, foliated	Mud Mountain	1653 ± 15		10.3 ± 1.1		17.0 ± 1.9	Amato et al., 2018	31.9855°N, -109.2477°W	1834
13MS09	Proterozoic	Granite	Mud Mountain	1656 ± 15				10.8 ± 2.1	Amato et al., 2018	33.3987°N, -107.1149°W	1649
16EP01	Cretaceous	Sandstone	East Potrillo Mountains					25.6–43.6		31.8860°N, -107.0170°W	1526
03SA3L	Proterozoic	Granite	San Andres Mountains	1644 ± 14			2.3–7.8		Amato, unpublished data	32.5898°N, -106.4700°W	1576
14SA32	Proterozoic	Granite	San Andres Mountains	1466 ± 18		10.5 ± 1.1			Amato, unpublished data	33.0817°N, -106.5961°W	1582
14SA44	Proterozoic	Granite	San Andres Mountains	1631 ± 12		11.0 ± 1.1		13.1–31.8	Amato, unpublished data	33.0423°N, -106.5742°W	1332
15SA88	Proterozoic	Orthogneiss	San Andres Mountains	1674 ± 16		10.4 ± 2.1		6.2–10.1	Amato, unpublished data	33.2707°N, -106.5333°W	1633
15SA80	Cambrian	Sandstone (Bliss)	San Andres Mountains				37.4–190.2			33.0149°N, -106.6136°W	1636
17SAS40	Proterozoic	Orthogneiss	San Andres Mountains	1672 ± 5			14.0 ± 0.3	8.4– 27.5	Amato, unpublished data	33.3084°N, -106.4767°W	1515
18SAS36	Proterozoic	Granite	San Andres Mountains	1648 ± 13				9.4–36.2	Amato, unpublished data	33.3182°N, -106.4786°W	1761
18SAS44	Proterozoic	Orthogneiss	San Andres Mountains	1671 ± 16		13.8 ± 2.0	12.8–43.0	3.4–45.0	Amato, unpublished data	33.2779°N, -106.5424°W	1788
18SAS51	Proterozoic	Granite	San Andres Mountains	1662 ± 15		14.4 ± 1.4	8.4–15.5	10.9 ± 1.2	Amato, unpublished data	33.2711°N, -106.5316°W	1607
15FR01	Proterozoic	Granite (Red Bluff)	Franklin Mountains	1120 ± 35				15.8–32.6	Shannon et al., 1997	31.7986°N, -106.4722°W	1273
15FR02	Proterozoic	Granite (Red Bluff)	Franklin Mountains	1120 ± 35			62.2–648.9		Shannon et al., 1997	31.8339°N, -106.4809°W	1421
15FR04	Proterozoic	Granite (Red Bluff)	Franklin Mountains	1120 ± 35			116.6–259.5		Shannon et al., 1997	31.8673°N, -106.4640°W	1379
15FR06	Proterozoic	Granite (Red Bluff)	Franklin Mountains	1120 ± 35				13.0–24.3	Shannon et al., 1997	31.8299°N, -106.4576°W	1273
15FR08	Proterozoic	Granite (Red Bluff)	Franklin Mountains	1120 ± 35				12.1–39.9	Shannon et al., 1997	31.9166°N, -106.4973°W	1871
Note: "hb" = hornblende
